# Supplementary material for: Synergetic mono- and bimetallic tungstate–biochar composites for efficient adsorptive removal of aniline blue from simulated wastewater: reusability, multivariate analysis, and greenness assessment
Source: Royal Society of Chemistry journal article supplement (doi:10.1039/d6ra02562e), 2026-05-26
Supplement: d6ra02562e1.pdf [file d6ra02562e1.pdf]

**Supplementary File:**

**Synergetic Mono- and Bimetallic Tungstate-Biochar Composites for Efficient Adsorptive Removal of Aniline Blue from Simulated Wastewater: Reusability, Multivariate Analysis, and Greenness Assessment**

**Kizhan S. Rostam<sup>1</sup>, Khanda F.M. Amin<sup>\*1</sup>**

<sup>1</sup>Department of Chemistry, College of Science, University of Sulaimani, Qlyasan Street, Kurdistan Regional Government, Sulaymaniyah, 46001, Iraq

**\*Corresponding authors**

*Khanda F.M. Amin*

Email: [khanda.mohammed@univsul.edu.iq](mailto:khanda.mohammed@univsul.edu.iq)

ORCID: <https://orcid.org/0000-0003-2456-2537>

**Table S1: Stoichiometric Composition of the Synthesized Composites**

| Composite | Target Composition                                                            | Metal Precursors (mmol)                                                                                                                                                          | Tungstate Precursor (mmol)                                                                                | Biochar (g) |
|-----------|-------------------------------------------------------------------------------|----------------------------------------------------------------------------------------------------------------------------------------------------------------------------------|-----------------------------------------------------------------------------------------------------------|-------------|
| MW/LB     | MnWO <sub>4</sub> /Biochar<br>78.5:21.5                                       | Mn <sup>2+</sup> = 5.0 mmol<br>(MnCl <sub>2</sub> ·4H <sub>2</sub> O, 0.989 g)                                                                                                   | WO <sub>4</sub> <sup>2-</sup> = 5.0 mmol<br>(Na <sub>2</sub> WO <sub>4</sub> ·2H <sub>2</sub> O, 1.683 g) | 0.50        |
| ZW/LB     | ZnWO <sub>4</sub> /Biochar<br>75.5:24.5                                       | Zn <sup>2+</sup> = 5.0 mmol<br>(Zn(NO <sub>3</sub> ) <sub>2</sub> ·6H <sub>2</sub> O, 1.487 g)                                                                                   | WO <sub>4</sub> <sup>2-</sup> = 5.0 mmol<br>(Na <sub>2</sub> WO <sub>4</sub> ·2H <sub>2</sub> O, 1.649 g) | 0.50        |
| ZMW/LB    | Zn <sub>0.1</sub> Mn <sub>0.9</sub> WO <sub>4</sub> /Biochar<br>6.8:71.5:21.7 | Mn <sup>2+</sup> = 4.5 mmol<br>(MnCl <sub>2</sub> ·4H <sub>2</sub> O, 0.890 g)<br>Zn <sup>2+</sup> = 0.5 mmol<br>(Zn(NO <sub>3</sub> ) <sub>2</sub> ·6H <sub>2</sub> O, 0.149 g) | WO <sub>4</sub> <sup>2-</sup> = 5.0 mmol<br>(Na <sub>2</sub> WO <sub>4</sub> ·2H <sub>2</sub> O, 1.683 g) | 0.50        |

**Table S2 Separation factor (RL) values for non-linear Langmuir isotherms, adsorption of Aniline Blue dye**

| C <sub>o</sub> (mg/L) | RL     |       |       |       |        |
|-----------------------|--------|-------|-------|-------|--------|
|                       | MW     | ZW    | MW/LB | ZW/LB | ZMW/LB |
| 10                    | 0.0255 | 0.273 | 0.862 | 0.893 | 0.877  |
| 20                    | 0.0129 | 0.158 | 0.757 | 0.806 | 0.781  |
| 40                    | 0.0103 | 0.131 | 0.610 | 0.676 | 0.641  |
| 60                    | 0.0086 | 0.111 | 0.510 | 0.581 | 0.543  |
| 80                    | 0.0065 | 0.086 | 0.439 | 0.510 | 0.471  |
| 100                   | 0.0052 | 0.070 | 0.385 | 0.455 | 0.416  |

**Table S3:** Thermodynamic parameters at different temperatures in simulated wastewater

| Adsorbent | T (K) | $\Delta G^\circ$ (KJ/mol) | Kd    | $\Delta S^\circ$ (J/mol.K) | $\Delta H^\circ$ (KJ/mol) |
|-----------|-------|---------------------------|-------|----------------------------|---------------------------|
| MW/LB     | 298   | -3.421                    | 1.447 | 66.577                     | 16.419                    |
|           | 308   | -4.086                    | 1.577 |                            |                           |
|           | 318   | -4.752                    | 1.737 |                            |                           |
|           | 328   | -5.418                    | 1.878 |                            |                           |
|           | 338   | -6.084                    | 2.285 |                            |                           |
| ZW/LB     | 298   | -4.863                    | 2.002 | 58.804                     | 12.658                    |
|           | 308   | -5.451                    | 2.150 |                            |                           |
|           | 318   | -6.039                    | 2.198 |                            |                           |
|           | 328   | -6.627                    | 2.369 |                            |                           |
|           | 338   | -7.215                    | 2.656 |                            |                           |
| ZMW/LB    | 298   | -3.299                    | 1.398 | 66.753                     | 16.591                    |
|           | 308   | -3.967                    | 1.471 |                            |                           |
|           | 318   | -4.634                    | 1.762 |                            |                           |
|           | 328   | -5.302                    | 1.882 |                            |                           |
|           | 338   | -5.969                    | 2.189 |                            |                           |

**Table S4:** Energy and Chemical Inputs for LCA

| Energy consumption     |              |
|------------------------|--------------|
| Process                | Energy (kWh) |
| Pyrolysis (biochar)    | 4            |
| Hydrothermal synthesis | 3            |
| Drying                 | 1            |
| Total                  | 8            |

**Table S5:** Chemical Consumption (per g adsorbent)

| Chemical Consumption (per g adsorbent) |        |        |        |
|----------------------------------------|--------|--------|--------|
| Material                               | MW/LB  | ZW/LB  | ZMW/LB |
| MnCl <sub>2</sub>                      | 0.20 g | —      | 0.18 g |
| Zn(NO <sub>3</sub> ) <sub>2</sub>      | —      | 0.20 g | 0.02 g |
| Na <sub>2</sub> WO <sub>4</sub>        | 0.30 g | 0.30 g | 0.30 g |
| NaOH                                   | 0.10 g | 0.10 g | 0.10 g |

**Table S6:** CO<sub>2</sub> Emission Factor

| CO <sub>2</sub> Emission Factor |                                                             |
|---------------------------------|-------------------------------------------------------------|
| Input                           | CO <sub>2</sub> factor kg CO <sub>2</sub> kWh <sup>-1</sup> |
| Electricity                     | 0.5                                                         |
| Mn salt                         | 3                                                           |
| Zn salt                         | 4                                                           |
| Na <sub>2</sub> WO <sub>4</sub> | 6                                                           |
| NaOH                            | 1.1                                                         |

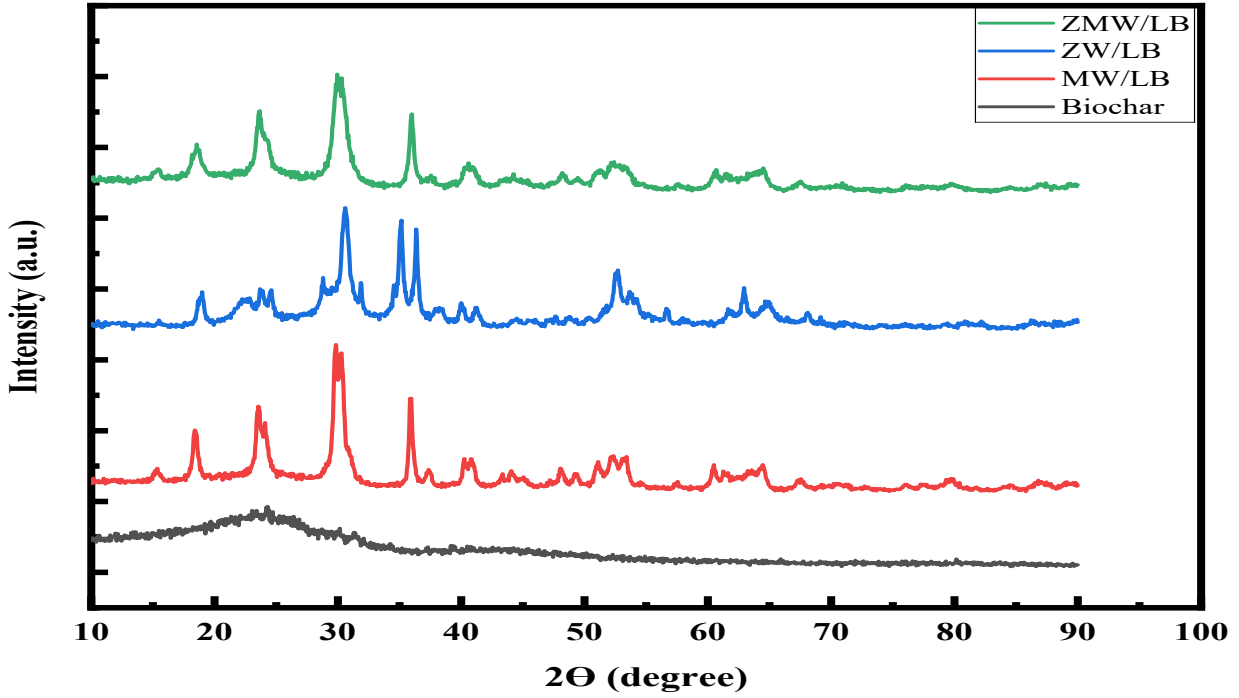

Figure S1: XRD for LB, MW/LB, ZW/LB, ZMW/LB

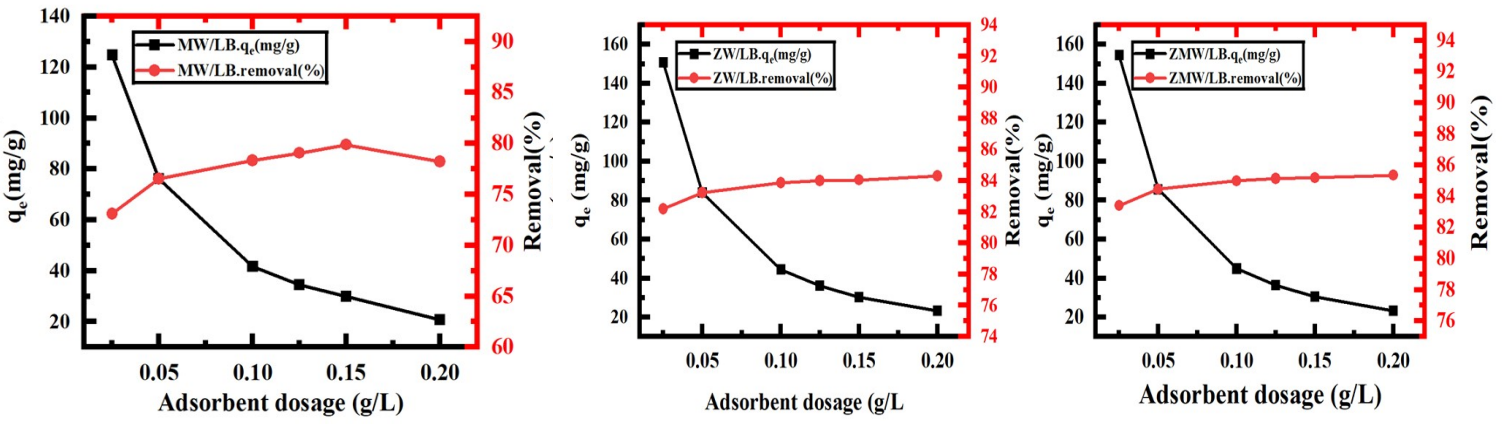

Figure S2: The influence of adsorbent dosage from 0.025–0.20 on AB adsorption onto the MW/LB, ZW/LB, and ZMW/LB in DIW

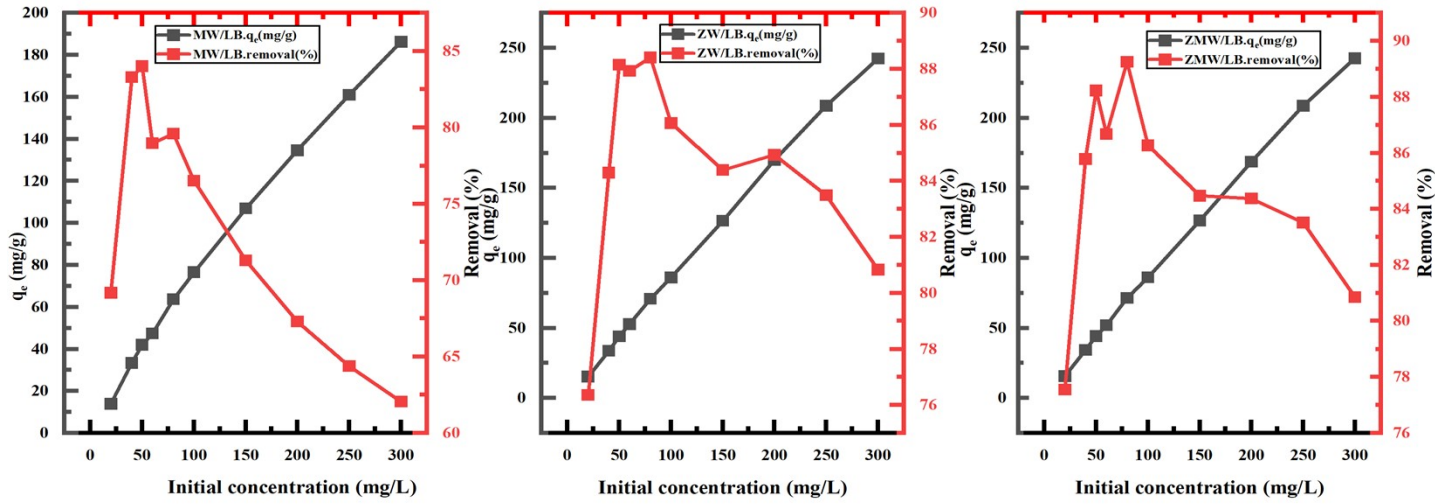

**Figure S3:** Effect of Initial dye concentration (AB) from 25 to 300 mg L<sup>-1</sup> on MW/LB, ZW/LB, ZMW/LB composite in DIW

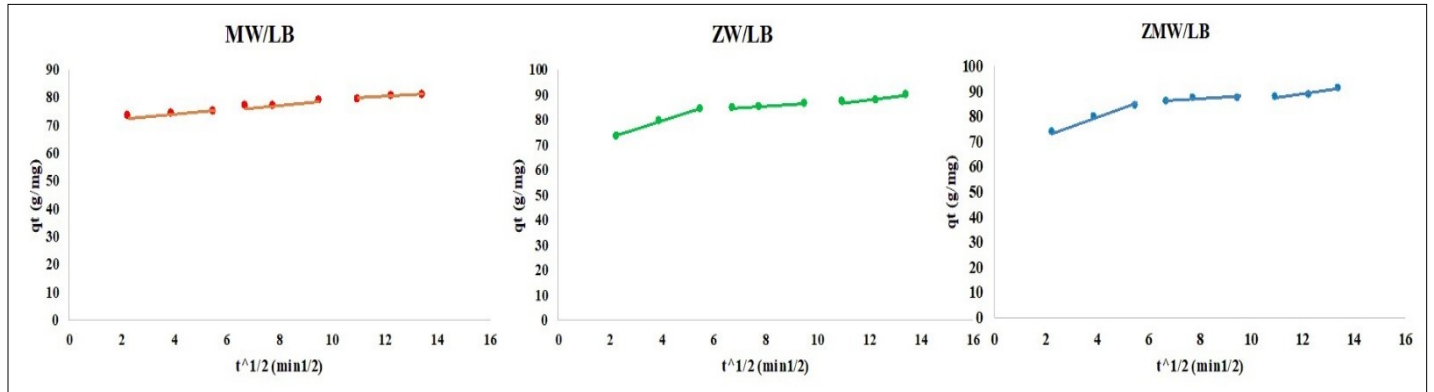

**Figure S4:** The intra-particle diffusion model for MW/LB, ZW/LB, ZMW/LB composite in DIW

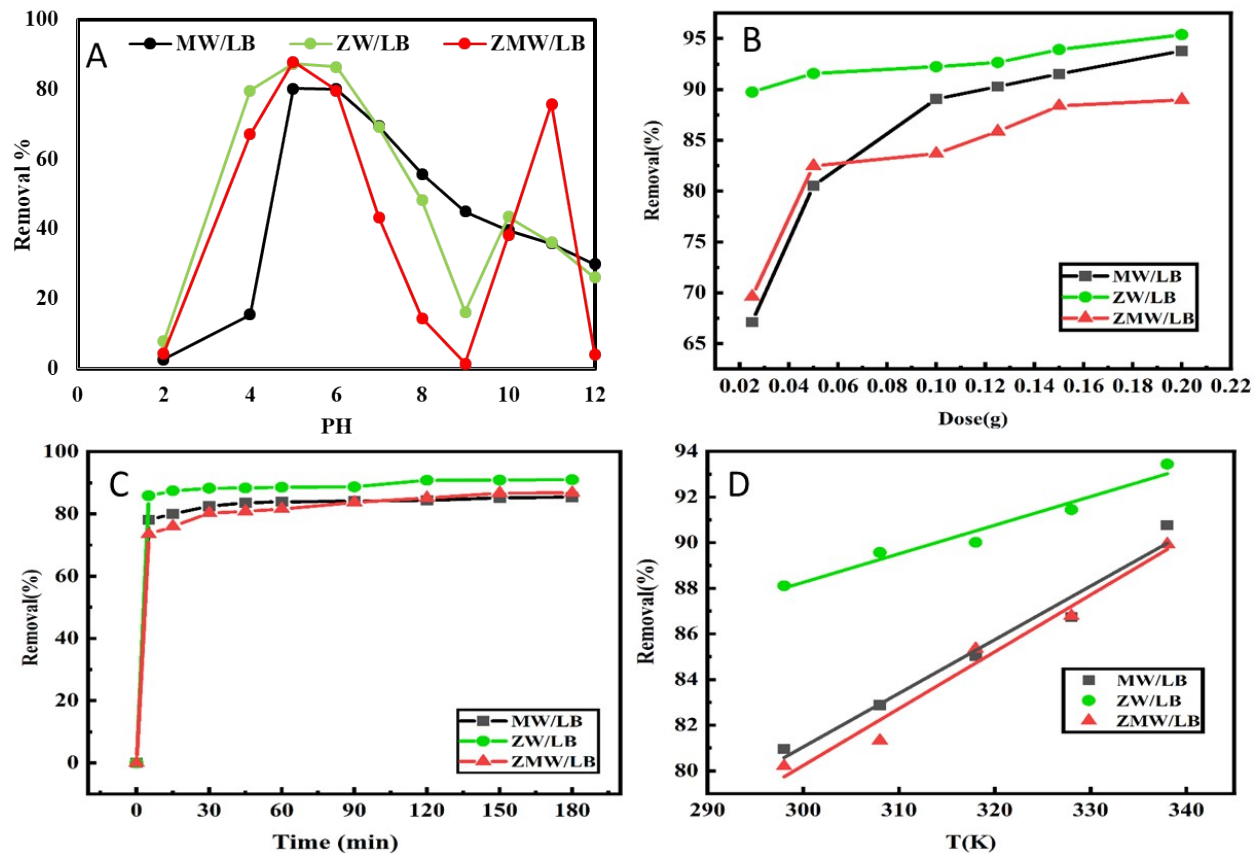

**Figure S5: Effects in SWW** (A) Impact of PH on the adsorption of AB onto the MW/LB, ZW/LB, and ZMW/LB at 25 °C; (B) the influence of adsorbent dosage from 0.025–0.20 on AB adsorption onto the MW/LB, ZW/LB, and ZMW/LB, (C) Impact of contact time on the adsorption of AB onto the MW/LB, ZW/LB, and ZMW/LB at 25 °C, and (D) Temperatures effects the adsorption of AB onto the MW/LB, ZW/LB, and ZMW/LB.

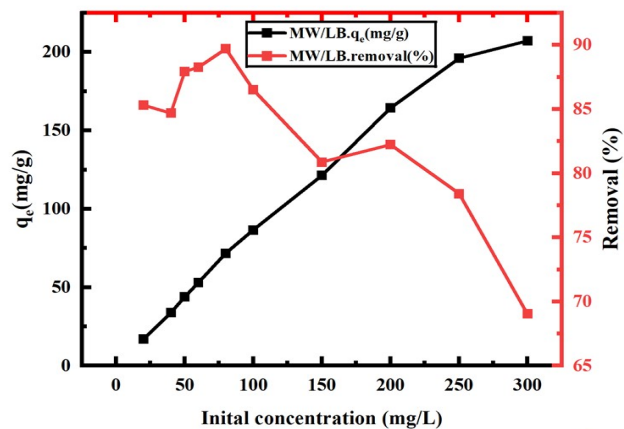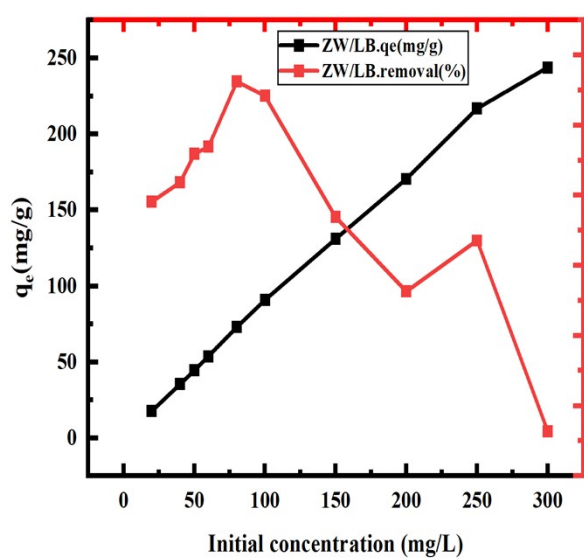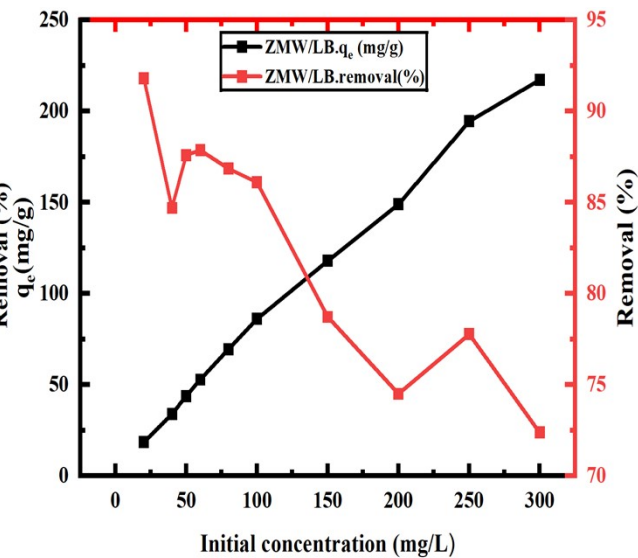

**Figure S6:**The effect of initial dye concentration on removal efficiency and adsorption capacity (mg/g) in SWW

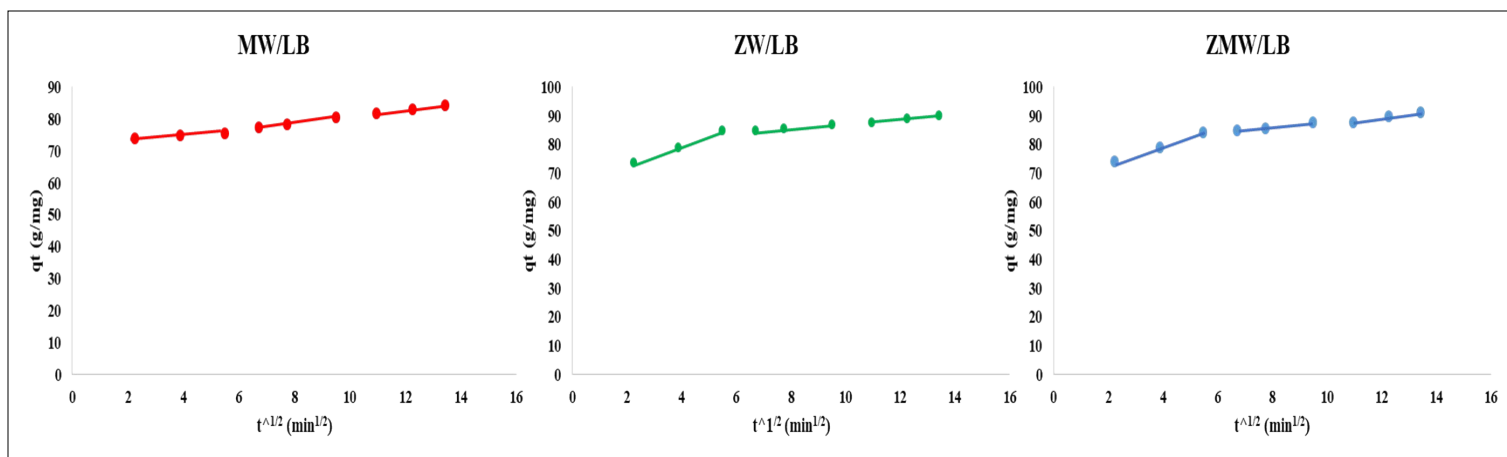

**Figure S7:** The intra-particle diffusion model for MW/LB, ZW/LB, ZMW/LB composite in SWW

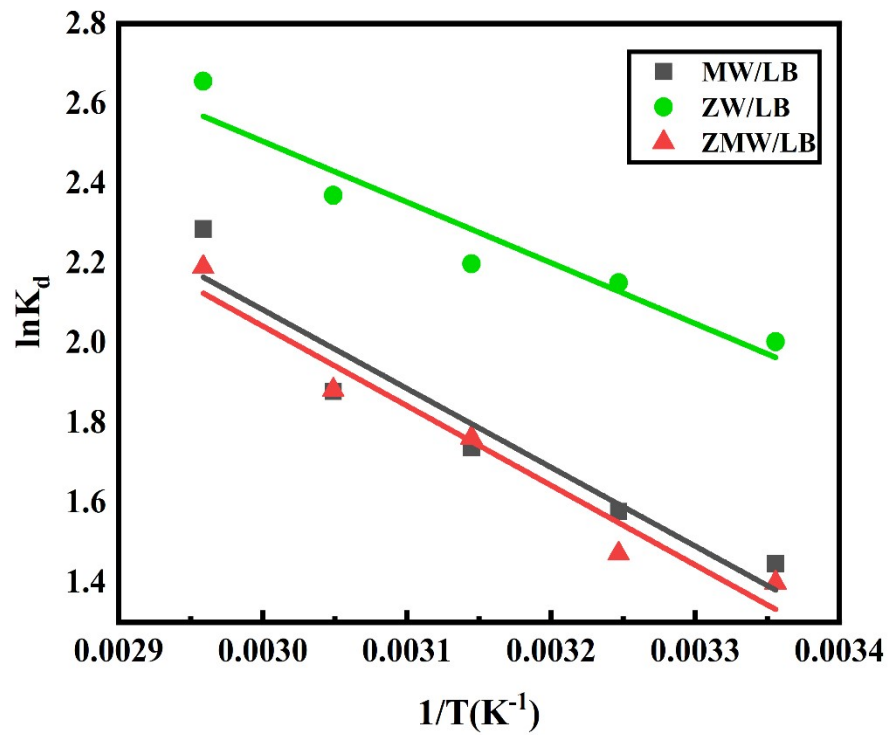

**Figure S8:** Van't Hoff curve for AB dye in SWW onto MW/LB, ZW/LB and ZMW/LB adsorbents
